# Supplementary material for: Rodent Models to Analyze the Glioma Microenvironment
Source: PubMed Central journal article supplement — ASN Neuro. 2021 Apr 19;13:17590914211005074. doi: 10.1177/17590914211005074 (PMC8060738; doi:10.1177/17590914211005074), 2021-04-19

## Rodent models to analyze the glioma microenvironment

Quick overview of available rodent model systems for glioma research.

Benefits and drawbacks of using in vivo models in the investigation of glioma, with a special focus on the tumor microenvironment (TME).

Novel combinations of synthetic cells with humanized tumour models are a promising approach.

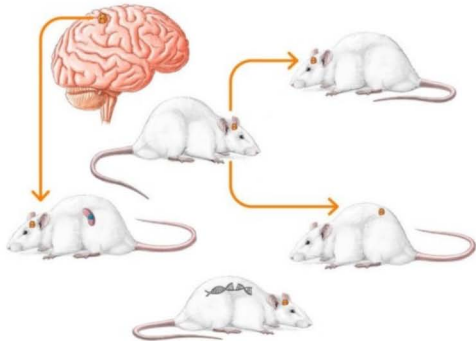

Supplement: sj-pdf-1-asn-10.1177_17590914211005074.pdf [file sj-pdf-1-asn-10.1177_17590914211005074.pdf]
